# Supplementary material for: Adeno-associated-virus-mediated transduction of the mammary gland enables sustained production of recombinant proteins in milk
Source: PubMed Central journal article supplement (PMC4604487; doi:10.1038/srep15115), 2015-10-14
Supplement: srep15115-s1.pdf [file srep15115-s1.pdf]

Adeno-associated-virus-mediated transduction of the mammary gland enables sustained production of recombinant proteins in milk.

Stefan Wagner, Rosemary Thresher, Ross Bland and Götz Laible

## Supplementary Figure S1

a

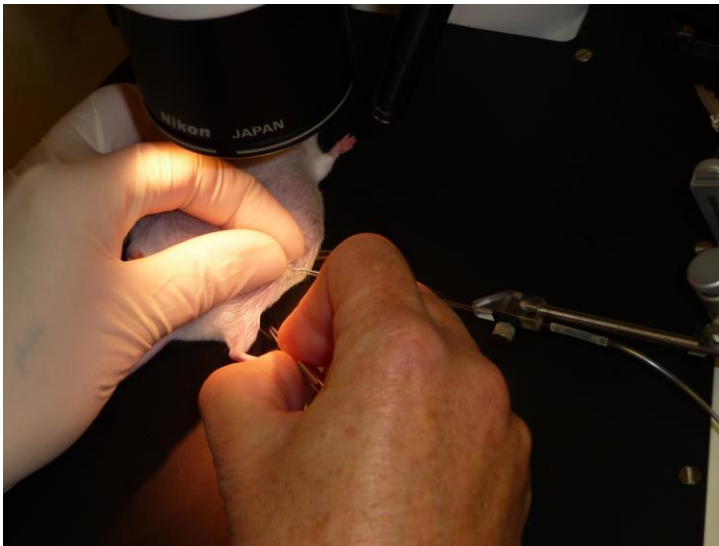

b

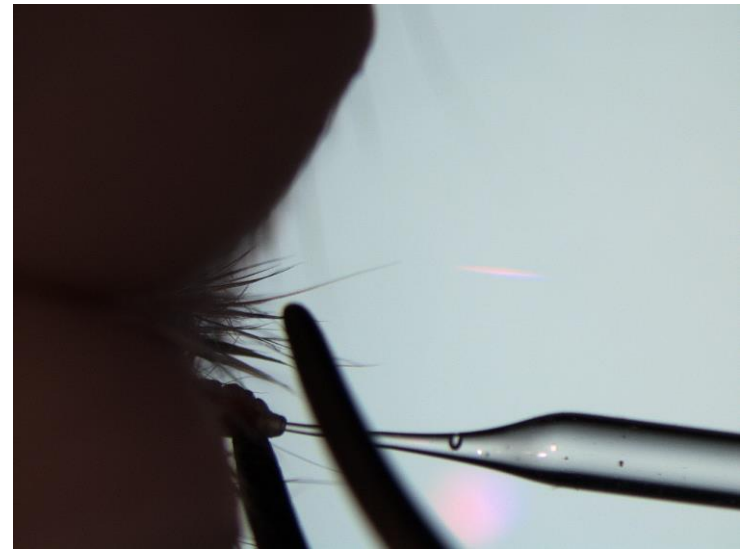

**Figure S1. rAAV injection in mice.** rAAV injection in the teat of day 15 pregnant mouse using a blunted glass capillary with a diameter of 60 to 80  $\mu\text{m}$ . a) experimental set-up at the microscope. b) close-up of the injection with glass capillary and tweezers.

Supplementary Figure S2: original, uncropped Western blot image of Figure 7

Western blot I  
W1 W3 W5 W7 W9 W11 W13

Western blot II  
W13 W15 W17 W19 W20 W21 C

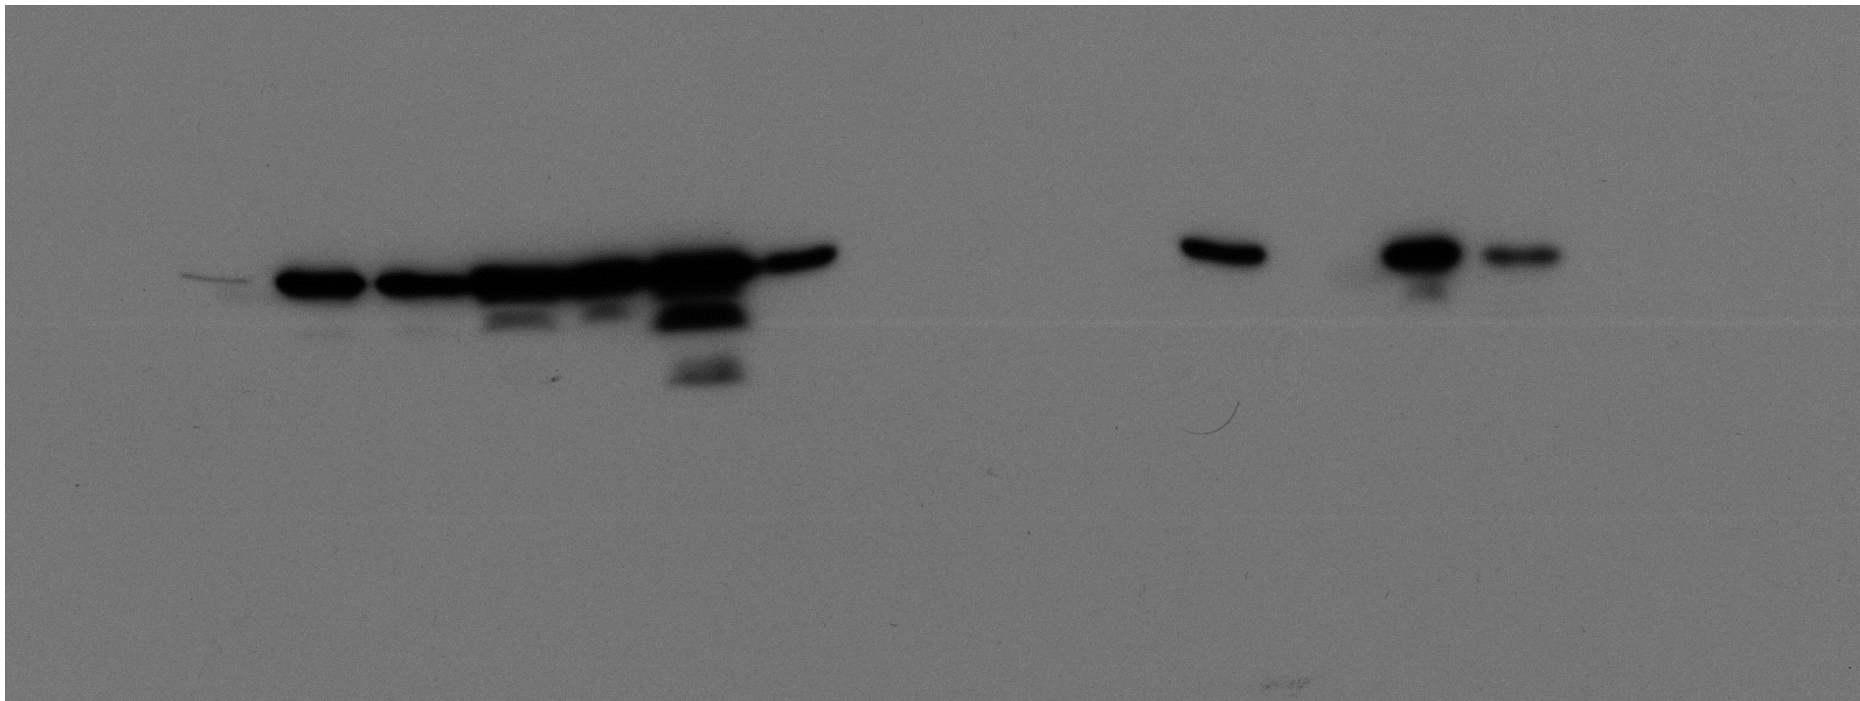

**Figure S2. MBP expression in a rAAV1-CBA-MBP-injected rabbit persists over 19 weeks.** Western blot with a MBP-specific antibody with milk samples of a rAAV1-CBA-MBP ( $3.2 \times 10^{12}$  vg) injected rabbit. W1 to W21 – week 1 to week 21. C – control, milk from a non-injected gland. Gels/blots were processed in parallel.

**Supplementary Table S1:** Summary of viral particle titers, determined by qPCR, for all rAAV preparations that were used in different experiments as indicated.

| <b>rAAV batch</b> | <b>Titer [vg/ml]</b> | <b>Injected animal(s)/figure(s)</b>     |
|-------------------|----------------------|-----------------------------------------|
| rAAV1 CBA-lacZ    | 5.3 exp 12           | Mouse/Figure 2                          |
| rAAV8 CBA-EGFP    | 1 exp 12             | Mouse/Figure 2                          |
| rAAV9 CBA-EGFP    | 1.75 exp 12          | Mouse/Figure 2                          |
| rAAV1 WAP-MBP     | 2.4 exp 13           | Mouse/Figure 3, 4, , 6, 8               |
| rAAV1 CBA-MBP-1   | 1.4 exp 12           | Mouse/Figure 3, 4, , 6, 8               |
| rAAV1-CBA-MBP-2   | 1 exp 13             | Mouse/Figure 6b                         |
| rAAV1 CBA-MBP-3   | 1.7 exp 13           | Mouse/Figure 5, 8<br>Rabbit/Figure 7, 8 |
